# Supplementary material for: The Micro-RNA Expression Profiles of Autoimmune Arthritis Reveal Novel Biomarkers of the Disease and Therapeutic Response
Source: PubMed Central journal article supplement (PMC6121685; doi:10.3390/ijms19082293), 2018-08-05

## SUPPLEMENTARY MATERIAL

Figure S1A

### B. Inflammatory disease

- 22.22%\_Immunological Disease, Inflammatory Disease, Inflammatory Response, Neurological Disease, Organismal Injury and Abnormalities
- 38.89%\_Connective Tissue Disorders, Inflammatory Disease, Inflammatory Response, Organismal Injury and Abnormalities, Respiratory Disease
- 38.89%\_Inflammatory Disease, Inflammatory Response, Organismal Injury and Abnormalities, Renal and Urological Disease

### C. Inflammatory response

- 14.58%\_Connective Tissue Disorders, Inflammatory Disease, Inflammatory Response, Organismal Injury and Abnormalities, Respiratory Disease
- 14.58%\_Inflammatory Disease, Inflammatory Response, Organismal Injury and Abnormalities, Renal and Urological Disease
- 25%\_Inflammatory Response, Organismal Injury and Abnormalities
- 27.08%\_Inflammatory Response
- 4.17%\_Cell-To-Cell Signaling and Interaction, Cellular Function and Maintenance, Inflammatory Response
- 6.25%\_Cell-To-Cell Signaling and Interaction, Cellular Function and Maintenance, Hematological System Development and Function, Inflammatory Response
- 8.33%\_Immunological Disease, Inflammatory Disease, Inflammatory Response, Neurological Disease, Organismal Injury and Abnormalities

### D. Connective tissue disorders

- 30%\_Cancer, Connective Tissue Disorders, Organismal Injury and Abnormalities
- 70%\_Connective Tissue Disorders, Inflammatory Disease, Inflammatory Response, Organismal Injury and Abnormalities, Respiratory Disease

Figure S1B

### E. Immunological disease

- 13.04%\_Immunological Disease
- 17.39%\_Immunological Disease, Inflammatory Disease, Inflammatory Response, Neurological Disease, Organismal Injury and Abnormalities
- 4.35%\_Hematological Disease, Immunological Disease
- 56.52%\_Cancer, Hematological Disease, Immunological Disease, Organismal Injury and Abnormalities
- 8.7%\_Cardiovascular Disease, DNA Replication, Recombination, and Repair, Developmental Disorder, Endocrine System Disorders, Hereditary Disorder, Immunological Disease, Neurological Disease, Organismal Injury and Abnormalities

### F. Cellular development

- 18.18%\_Cancer, Cellular Development, Cellular Growth and Proliferation, Organismal Injury and Abnormalities, Tumor Morphology
- 18.18%\_Cellular Development, Cellular Growth and Proliferation
- 27.27%\_Cellular Development
- 9.09%\_Cancer, Cellular Development, Cellular Growth and Proliferation, Organismal Injury and Abnormalities, Respiratory Disease, Tumor Morphology
- 9.09%\_Cellular Development, Cellular Growth and Proliferation, Connective Tissue Development and Function, Hematological System Development and Function, Hematopoiesis, Organismal Development, Tissue Development
- 9.09%\_Cellular Development, Cellular Growth and Proliferation, Hematological System Development and Function, Hematopoiesis, Lymphoid Tissue Structure and Development, Tissue Development
- 9.09%\_Cellular Development, Hematological System Development and Function

Figure S2A

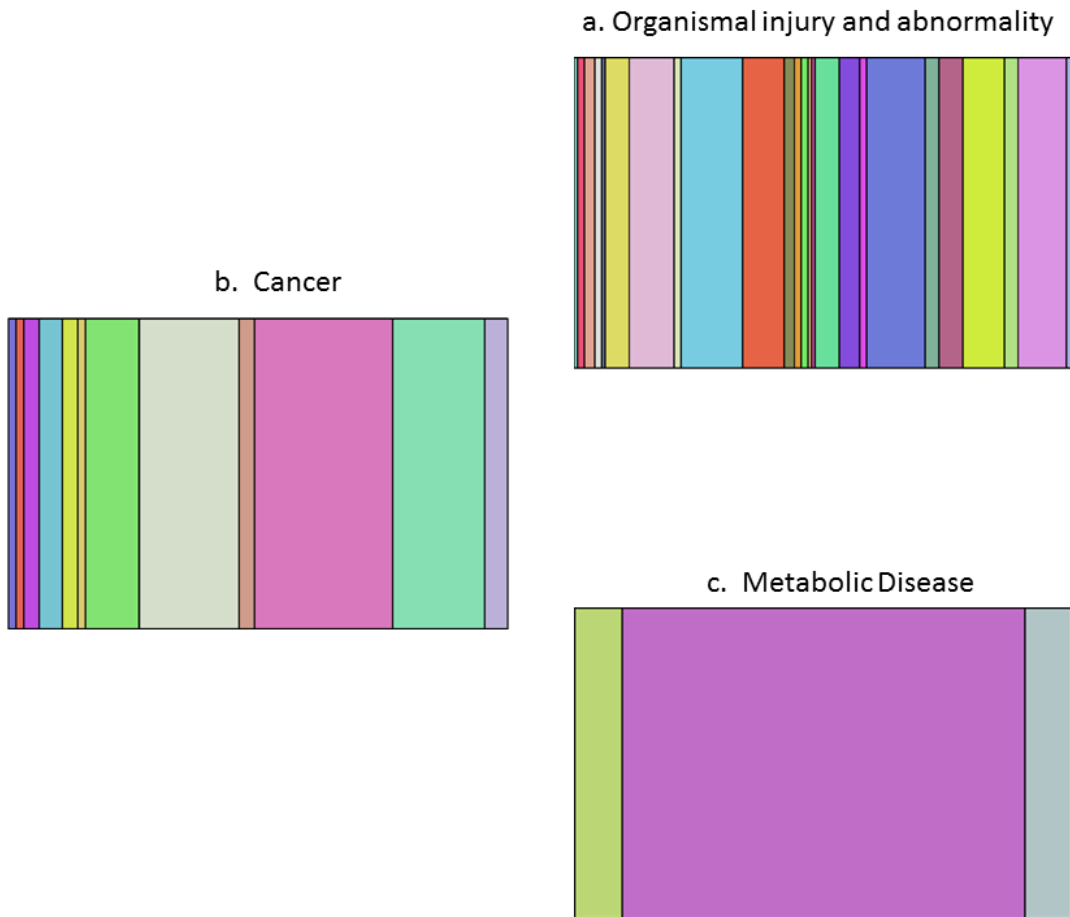

Figure S2B

### a. Organismal injury and abnormality

- 0.69%\_Cancer, Cellular Development, Cellular Growth and Proliferation, Organismal Injury and Abnormalities, Respiratory Disease, Tumor Morphology
- 0.69%\_Cancer, Gastrointestinal Disease, Organismal Injury and Abnormalities
- 0.69%\_Cardiovascular Disease, Organismal Injury and Abnormalities, Tissue Morphology
- 0.69%\_Cellular Compromise, Organismal Injury and Abnormalities
- 1.38%\_Cancer, Cellular Development, Cellular Growth and Proliferation, Organismal Injury and Abnormalities, Tumor Morphology
- 1.38%\_Cancer, Endocrine System Disorders, Organismal Injury and Abnormalities
- 1.38%\_Cancer, Neurological Disease, Organismal Injury and Abnormalities
- 1.38%\_Cardiovascular Disease, DNA Replication, Recombination, and Repair, Developmental Disorder, Endocrine System Disorders, Hereditary Disorder, Immunological Disease, Neurological Disease, Organismal Injury and Abnormalities
- 1.38%\_Cardiovascular Disease, Organismal Injury and Abnormalities
- 1.38%\_Endocrine System Disorders, Gastrointestinal Disease, Hepatic System Disease, Metabolic Disease, Organismal Injury and Abnormalities
- 1.38%\_Organismal Injury and Abnormalities, Skeletal and Muscular Disorders
- 11.72%\_Endocrine System Disorders, Gastrointestinal Disease, Metabolic Disease, Organismal Injury and Abnormalities
- 12.41%\_Cancer, Organismal Injury and Abnormalities
- 2.07%\_Cancer, Connective Tissue Disorders, Organismal Injury and Abnormalities
- 2.07%\_Cancer, Organismal Injury and Abnormalities, Reproductive System Disease, Skeletal and Muscular Disorders
- 2.76%\_Immunological Disease, Inflammatory Disease, Inflammatory Response, Neurological Disease, Organismal Injury and Abnormalities
- 2.76%\_Organismal Injury and Abnormalities
- 4.14%\_Dermatological Diseases and Conditions, Organismal Injury and Abnormalities
- 4.83%\_Cancer, Gastrointestinal Disease, Organismal Injury and Abnormalities, Respiratory Disease
- 4.83%\_Connective Tissue Disorders, Inflammatory Disease, Inflammatory Response, Organismal Injury and Abnormalities, Respiratory Disease
- 4.83%\_Inflammatory Disease, Inflammatory Response, Organismal Injury and Abnormalities, Renal and Urological Disease
- 8.28%\_Cancer, Organismal Injury and Abnormalities, Reproductive System Disease
- 8.28%\_Inflammatory Response, Organismal Injury and Abnormalities
- 8.97%\_Cancer, Hematological Disease, Immunological Disease, Organismal Injury and Abnormalities
- 9.66%\_Organismal Injury and Abnormalities, Reproductive System Disease

Figure S2C

### b. Cancer

- 1.54%\_Cancer
- 1.54%\_Cancer, Cellular Development, Cellular Growth and Proliferation, Organismal Injury and Abnormalities, Respiratory Disease, Tumor Morphology
- 1.54%\_Cancer, Gastrointestinal Disease, Organismal Injury and Abnormalities
- 10.77%\_Cancer, Gastrointestinal Disease, Organismal Injury and Abnormalities, Respiratory Disease
- 18.46%\_Cancer, Organismal Injury and Abnormalities, Reproductive System Disease
- 20%\_Cancer, Hematological Disease, Immunological Disease, Organismal Injury and Abnormalities
- 27.69%\_Cancer, Organismal Injury and Abnormalities
- 3.08%\_Cancer, Cellular Development, Cellular Growth and Proliferation, Organismal Injury and Abnormalities, Tumor Morphology
- 3.08%\_Cancer, Endocrine System Disorders, Organismal Injury and Abnormalities
- 3.08%\_Cancer, Neurological Disease, Organismal Injury and Abnormalities
- 4.62%\_Cancer, Connective Tissue Disorders, Organismal Injury and Abnormalities
- 4.62%\_Cancer, Organismal Injury and Abnormalities, Reproductive System Disease, Skeletal and Muscular Disorders

### c. Metabolic Disease

- 80.95%\_Endocrine System Disorders, Gastrointestinal Disease, Metabolic Disease, Organismal Injury and Abnormalities
- 9.52%\_Endocrine System Disorders, Gastrointestinal Disease, Hepatic System Disease, Metabolic Disease, Organismal Injury and Abnormalities
- 9.52%\_Endocrine System Disorders, Hematological Disease, Metabolic Disease

Figure S3

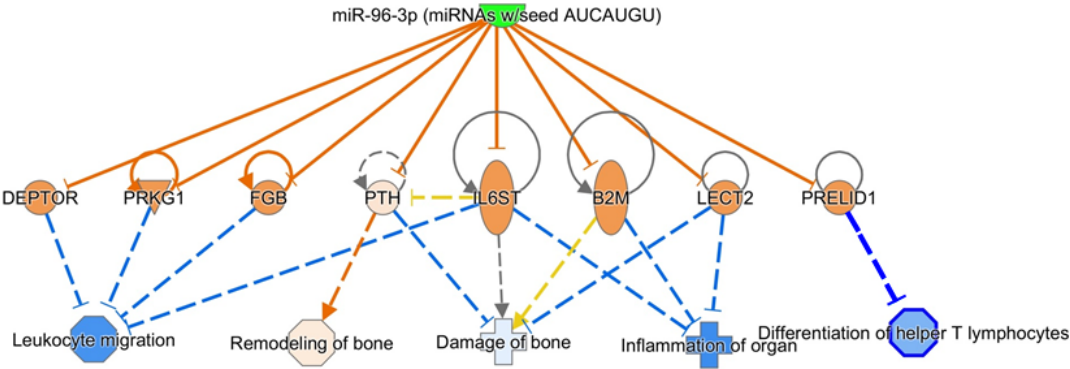

Supplement: ijms-19-02293-s001.pdf [file ijms-19-02293-s001.pdf]
